# Supplementary material for: One-pot synthesis of ultra-small magnetite nanoparticles on the surface of reduced graphene oxide nanosheets as anodes for sodium-ion batteries
Source: Royal Society of Chemistry journal article supplement (doi:10.1039/c4ta06708h), 2015-01-01
Supplement: c4ta06708h1.pdf [file c4ta06708h1.pdf]

## One-pot synthesis of ultra-small magnetite nanoparticles on the surface of reduced graphene oxide nanosheets as anode for sodium-ion batteries

Shaohua Zhang,<sup>a</sup> Weijie Li,<sup>a</sup> Bien Tan,<sup>c</sup> Shulei Chou,<sup>a</sup> Zhen Li,<sup>a,b,\*</sup> and Shixue Dou<sup>a</sup>

<sup>a</sup> Institute for Superconducting and Electronic Materials, Australian Institute for Innovative Materials, University of Wollongong, Squires Way, North Wollongong, NSW 2500, Australia.

<sup>b</sup> School of Radiation Medicine and Radiation Protection, Collaborative Innovation Center of Radiological Medicine of Jiangsu Higher Education Institutions, Soochow University, 199 RenAi Road, Suzhou Industrial Park, Suzhou 215123, China.

<sup>c</sup> School of Chemistry and Chemical Engineering, Huazhong University of Science and Technology, Wuhan 430074, China.

\* Corresponding author: zhenl@uow.edu.au; Fax: +61-2-42215731; Tel: +61-2-42215163

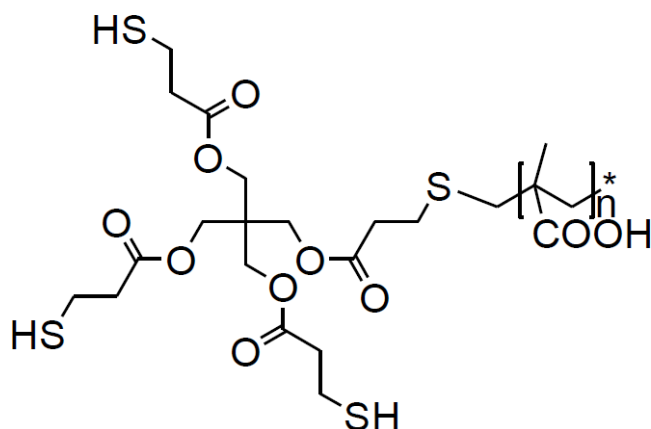

**Scheme S1.** Molecular structure of multidentate polymer ligand poly(methacrylic acid) pentaerythritol tetrakis (3-mercaptopropionate) (PMAA-PTMP).

## Part S1. Experimental Section

### Materials

Iron (III) chloride hexahydrate ( $\text{FeCl}_3 \cdot 6\text{H}_2\text{O}$ , 97%), iron (II) sulfate heptahydrate ( $\text{FeSO}_4 \cdot 7\text{H}_2\text{O}$ ,  $\geq 99\%$ ), ammonium hydroxide solution ( $\text{NH}_3 \cdot \text{H}_2\text{O}$ , 28%), hydrochloric acid (HCl, 37%), anhydrous ethanol (99.5%), and acetone (99.9%) were purchased from Sigma-Aldrich and used as received without any purification. PMAA-PTMP was prepared as presented elsewhere.<sup>1</sup>

### Synthesis of RGO/ $\text{Fe}_3\text{O}_4$ / PMAA-PTMP nanocomposites (RGOF)

Graphene oxide (GO) nanosheets were synthesised from natural graphite powder by a modified Hummers method.<sup>2</sup> The composites were synthesized by using different volume of GO, i.e., 0.5 mL (~2.67 mg GO), 1 mL (~5.34 mg GO), and 1.5 mL (~8.01 mg GO), and are denoted as RGOF-1, RGOF-2, and RGOF-3 respectively. The typical synthesis is described as follows. 1 mL GO dispersion and PMAA-PTMP (0.1689 g, molecular weight ( $M_w$ ) 5800  $\text{g mol}^{-1}$ ) was dissolved in Milli-Q water (50 mL) and purged with nitrogen to remove oxygen. The GO and polymer solution was then heated to 100 °C in an oil bath (130 °C) to reflux. Meanwhile,  $\text{FeCl}_3 \cdot 6\text{H}_2\text{O}$  (0.1378 g, 0.51 mmol) and  $\text{FeSO}_4 \cdot 7\text{H}_2\text{O}$  (0.0701 g, 0.252 mmol) were dissolved in concentrated HCl (1 mL). Then, the mixture of iron precursors was quickly injected into the GO/polymer solution, followed by the addition of concentrated ammonia solution (15 mL, 28%). The solution became black immediately, and the resultant black solution was refluxed for 2 h. Then, 50  $\mu\text{L}$  hydrazine solution was added into the mixture under vigorous magnetic stirring and kept refluxing for 3 h. The mixture was then cooled to room temperature naturally. The as-obtained black precipitates were washed thoroughly with deionized water and absolute alcohol several times, respectively, and finally dried in air at room temperature for further characterization. For comparison, bare RGO/ $\text{Fe}_3\text{O}_4$  using 1 mL GO dispersion without PMAA-PTMP and  $\text{Fe}_3\text{O}_4$ /PMAA-PTMP using PMAA-PTMP without GO dispersion were also synthesized under the same procedure.

### Structural and physical characterization

The morphology and microstructure of the as-prepared samples were examined by field-emission scanning electron microscopy (FESEM; JEOL JSM-7500FA) and transmission electron microscopy (TEM, JEOL 2011, 200 keV). The powder X-ray diffraction (XRD) patterns of the nanocomposites were obtained using Cu-K $\alpha$  radiation ( $\lambda = 1.54056 \text{ \AA}$ ) in the reflection geometry on a GBC-MMA instrument operating at 40 kV and 25 mA. Raman spectra were collected with a Jobin Yvon HR800 Raman spectrometer with a 10 mW He-Ne laser at 632.8 nm excitation. X-ray photoelectron spectroscopy (XPS) was carried out on a Thermo Scientific Sigma Probe instrument using Al K $\alpha$  X-ray radiation and in fixed analyser transmission mode. Thermogravimetric analysis (TGA) was performed to analyse the weight ratios of the nanocomposites at a heating rate of 10 °C  $\text{min}^{-1}$  from room temperature to 700 °C under air and argon atmosphere respectively by using a thermogravimetric analyzer PerkinElmer TG/DTA 6300. Nitrogen adsorption-desorption measurements were conducted at 77 K with a Quantachrome Autosorb iQ (USA). Before measurements, the samples were degassed under vacuum at 120 °C for 6 h. The Brunauer-Emmett-Teller (BET) specific surface area was calculated from the adsorption data in the relative pressure (P/P $_0$ ) ranging from 0.05 to 0.35.

### Electrochemical measurements

The nanocomposite-based electrodes were prepared by mixing 70% active materials, 10% carbon black, and 20% carboxymethyl cellulose (CMC) binder by weight to form an electrode slurry, which then was coated on copper foil, followed by drying in a vacuum oven overnight at 80 °C, and then pressing at 30 MPa. The loading mass for each electrode is about 2 mg. Sodium foil was cut by the doctor blade technique from a sodium bulk stored in mineral oil, which then was employed as both reference and counter electrode. The electrolyte was 1.0 mol/L NaClO<sub>4</sub> in an ethylene carbonate (EC) - diethyl carbonate (DEC) solution (1:1 v/v), with 5 vol.% addition of fluoroethylene carbonate (FEC). The cells were assembled in an argon-filled glove box. The electrochemical performances were tested on a Land Test System in the voltage range of 0-2 V (vs. Na<sup>+</sup>/Na) at current density of 40 mA g<sup>-1</sup>. The specific capacity of the electrode was calculated based on the total mass of composites (about 2 mg).

## References

- (1) Z. Li, P. W. Yi, Q. Sun, H. Lei, H. L. Zhao, Z. H. Zhu, S. C. Smith, M. B. Lan, G. Q. Lu, *Adv. Funct. Mater.*, 2012, **22**, 2387.
- (2) D. C. Marcano, D. V. Kosynkin, J. M. Berlin, A. Sinitskii, Z. Sun, A. Slesarev, L. B. Alemany, W. Lu, J. M. Tour, *ACS Nano*, 2010, **4**, 4806.

Part S2. Figures

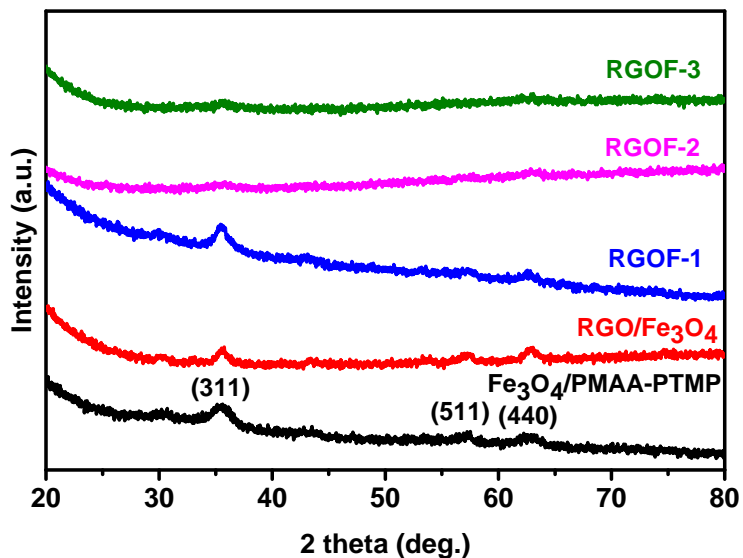

**Figure S1.** XRD patterns of Fe<sub>3</sub>O<sub>4</sub>/PMAA-PTMP, RGO/Fe<sub>3</sub>O<sub>4</sub>, and RGOFe nanocomposites in the range of 20° to 80°.

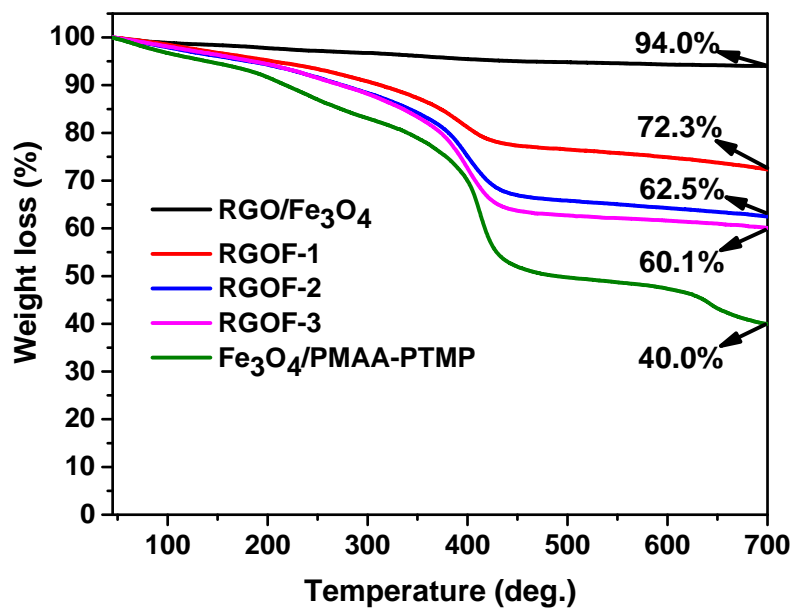

**Figure S2.** TGA curves for pristine Fe<sub>3</sub>O<sub>4</sub>/PMAA-PTMP, RGO/Fe<sub>3</sub>O<sub>4</sub>, and RGOFe composites under argon atmosphere.

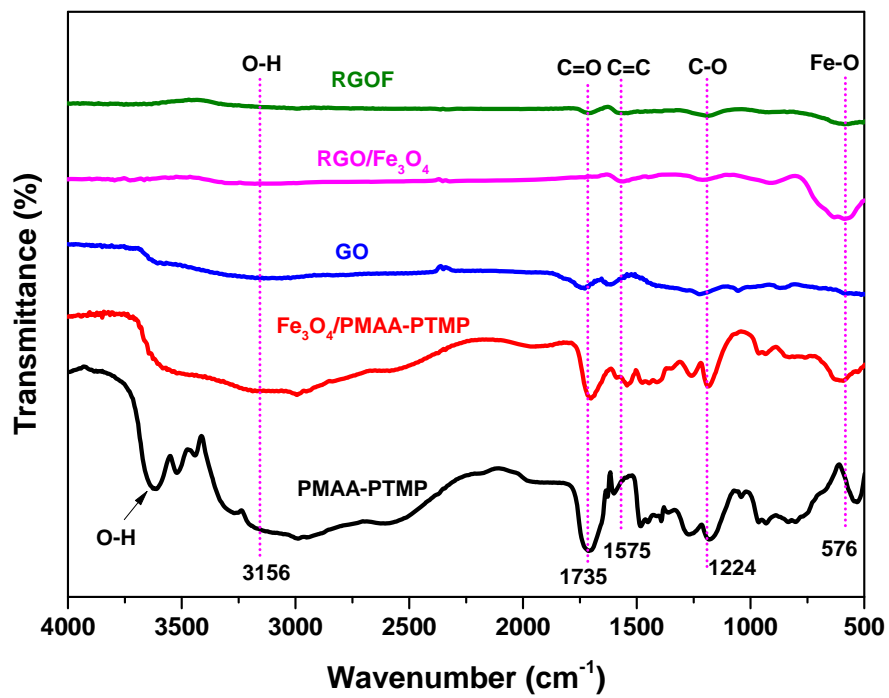

**Figure S3.** FT-IR spectra of pure PMAA-PTMP, Fe<sub>3</sub>O<sub>4</sub>/PMAA-PTMP, GO, RGO/Fe<sub>3</sub>O<sub>4</sub>, and RGOF.

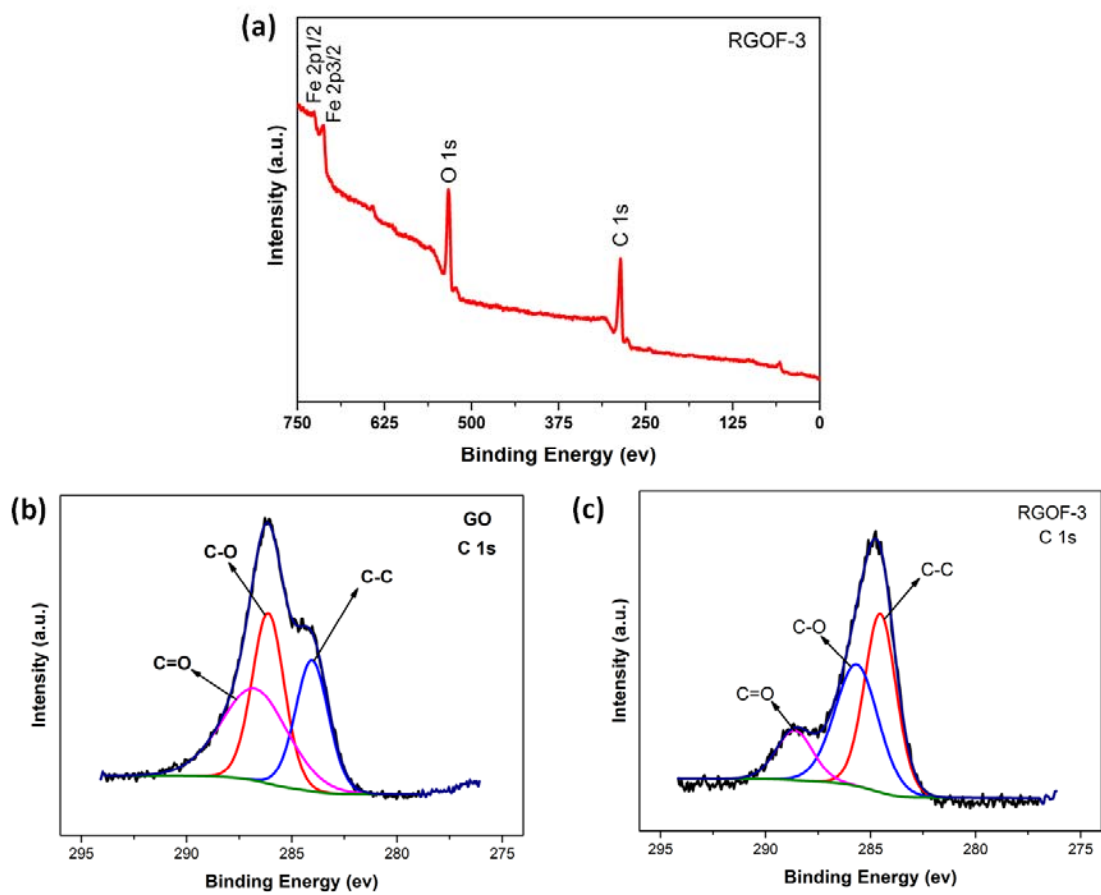

**Figure S4.** XPS spectra of RGOF-3 and GO: (a) survey scan of RGOF-3; C 1s spectra of (b) GO and (c) RGOF-3.

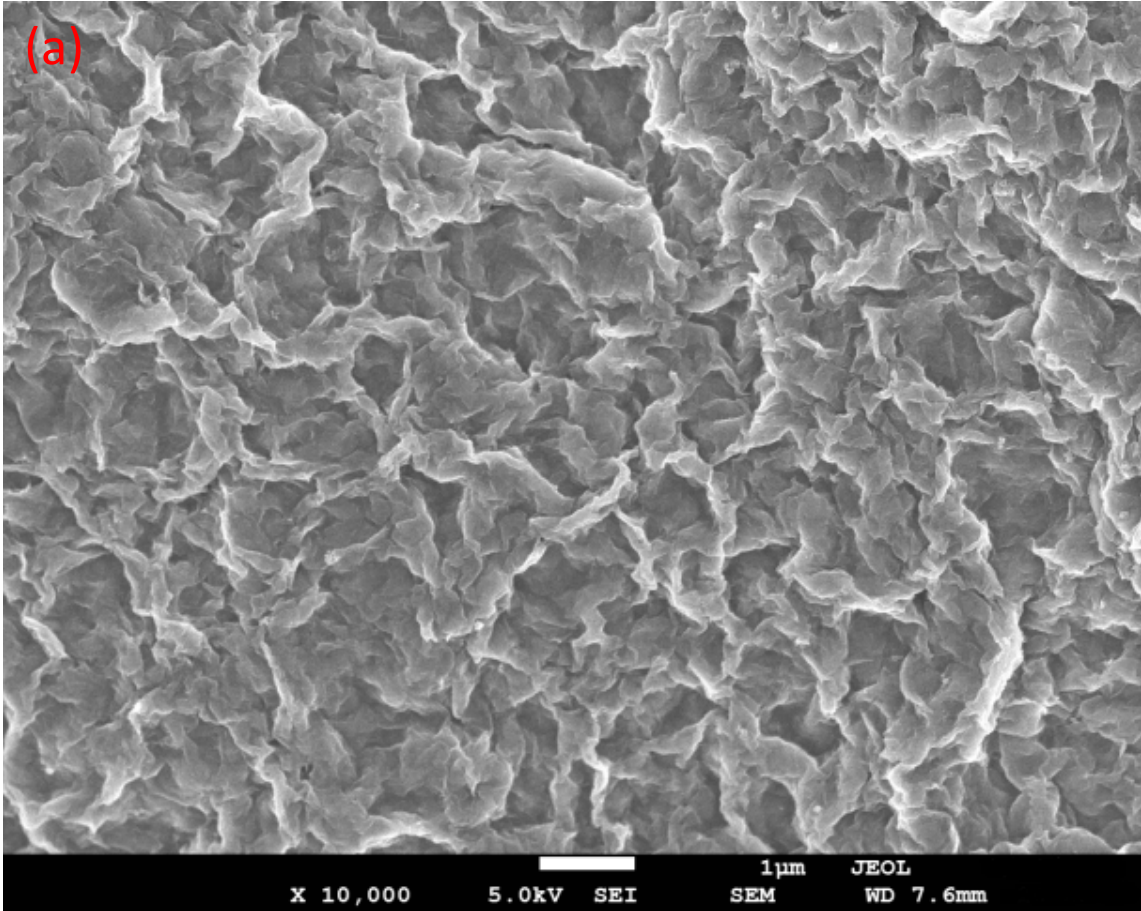



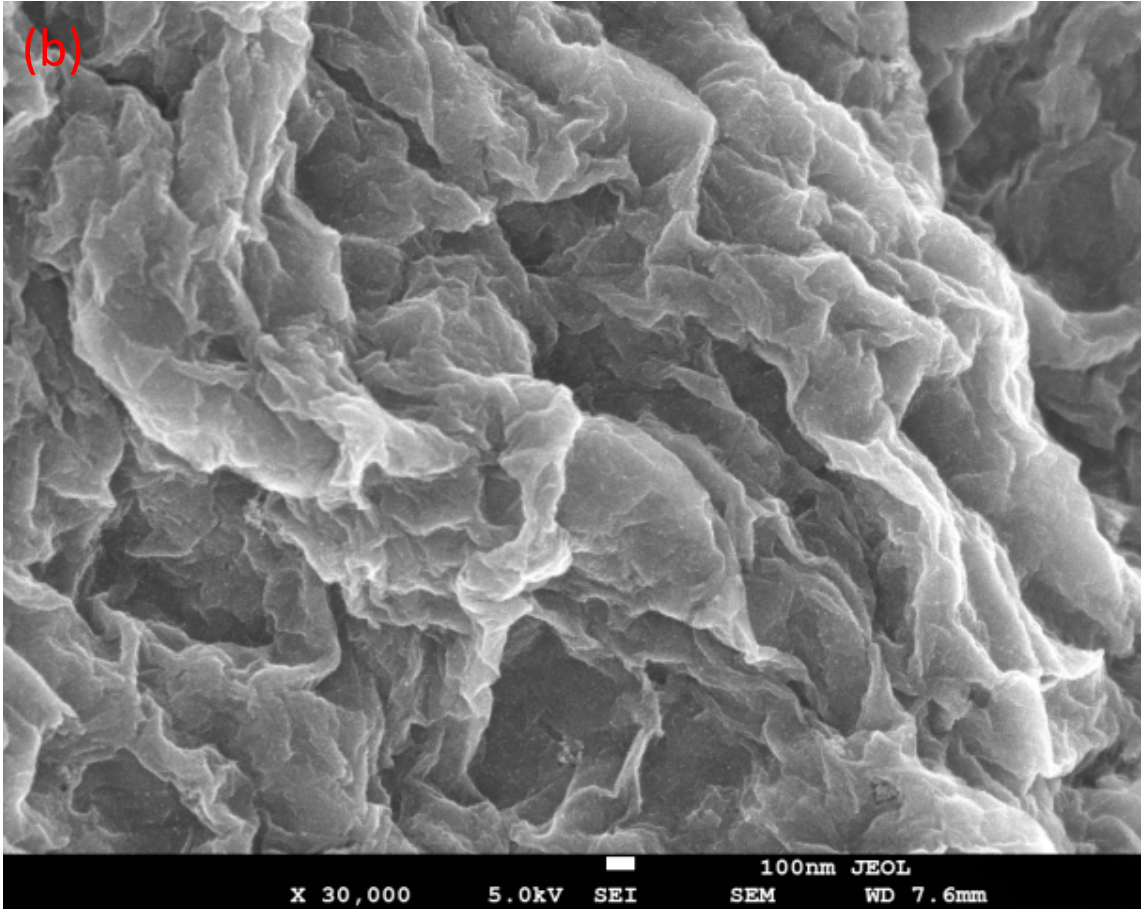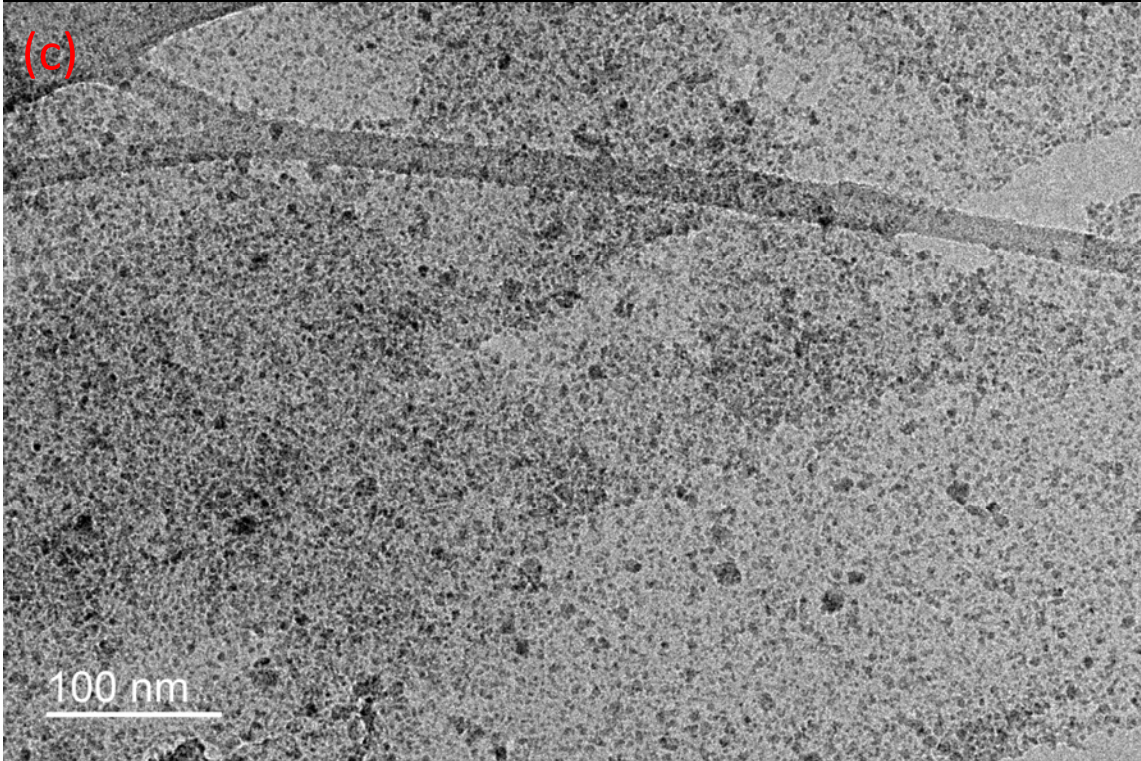



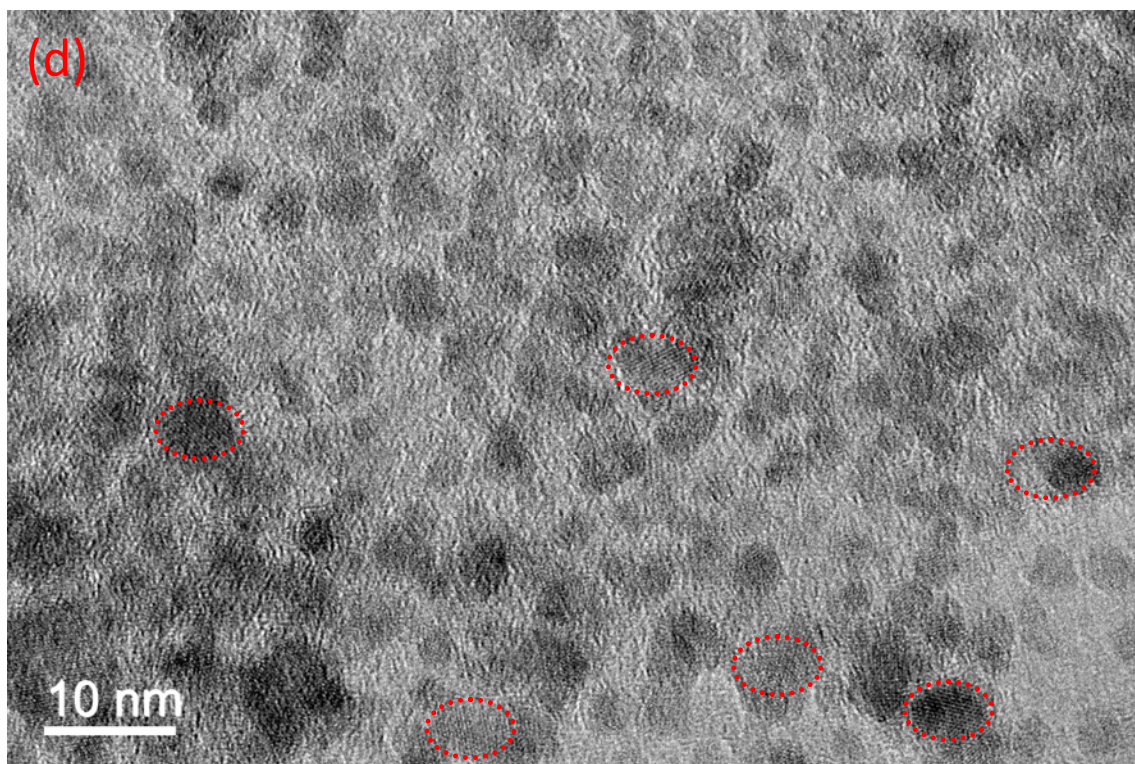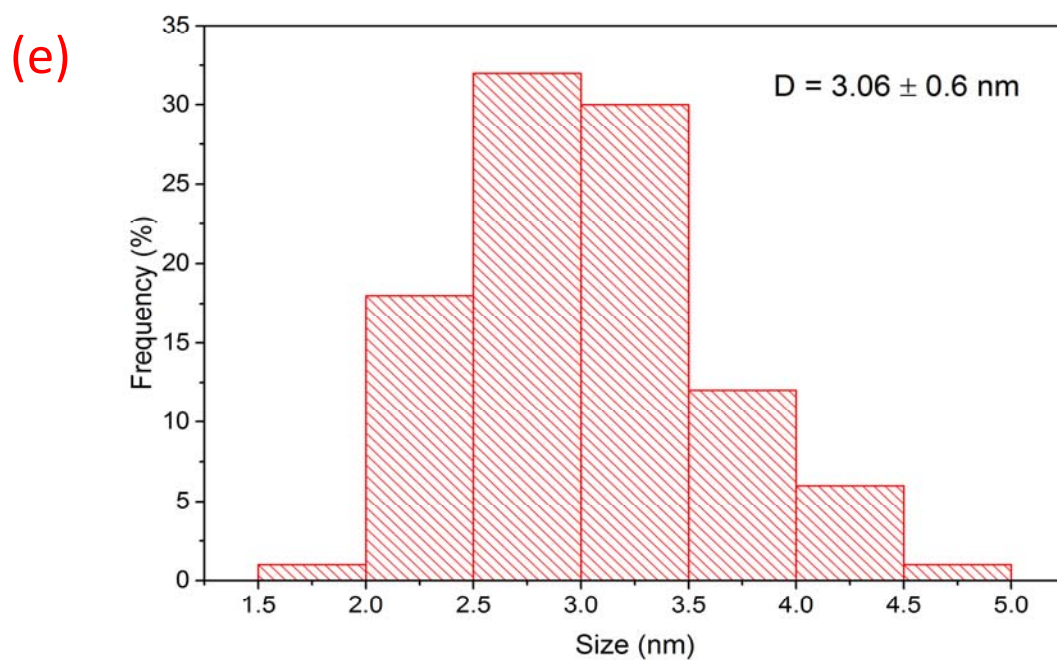

**Figure S5.** SEM (a, b) and TEM images (c, d) of RGOF-3 at different magnifications, and (e) its size distribution histogram of loaded  $\text{Fe}_3\text{O}_4$  nanoparticles counted from 200 particles. The circled areas in (d) show the high crystallinity of  $\text{Fe}_3\text{O}_4$  nanoparticles.

(a)

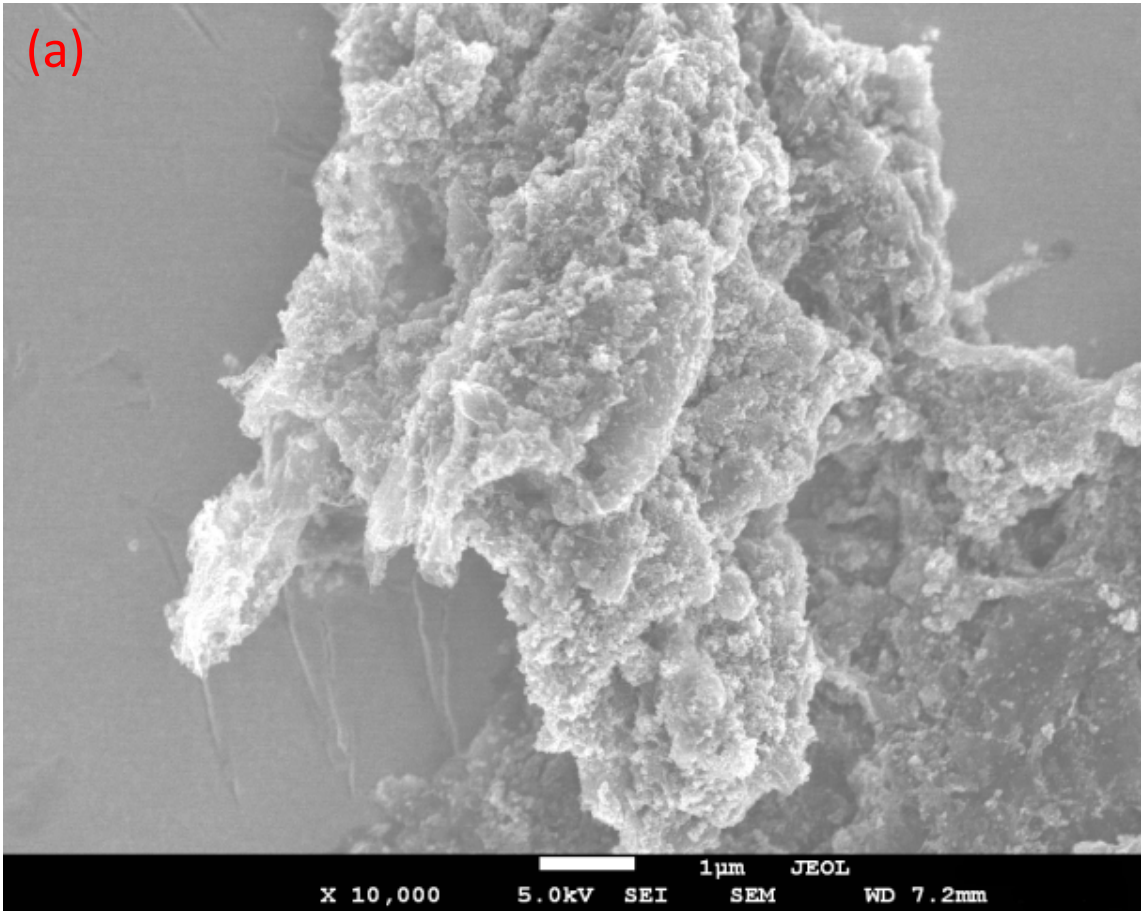



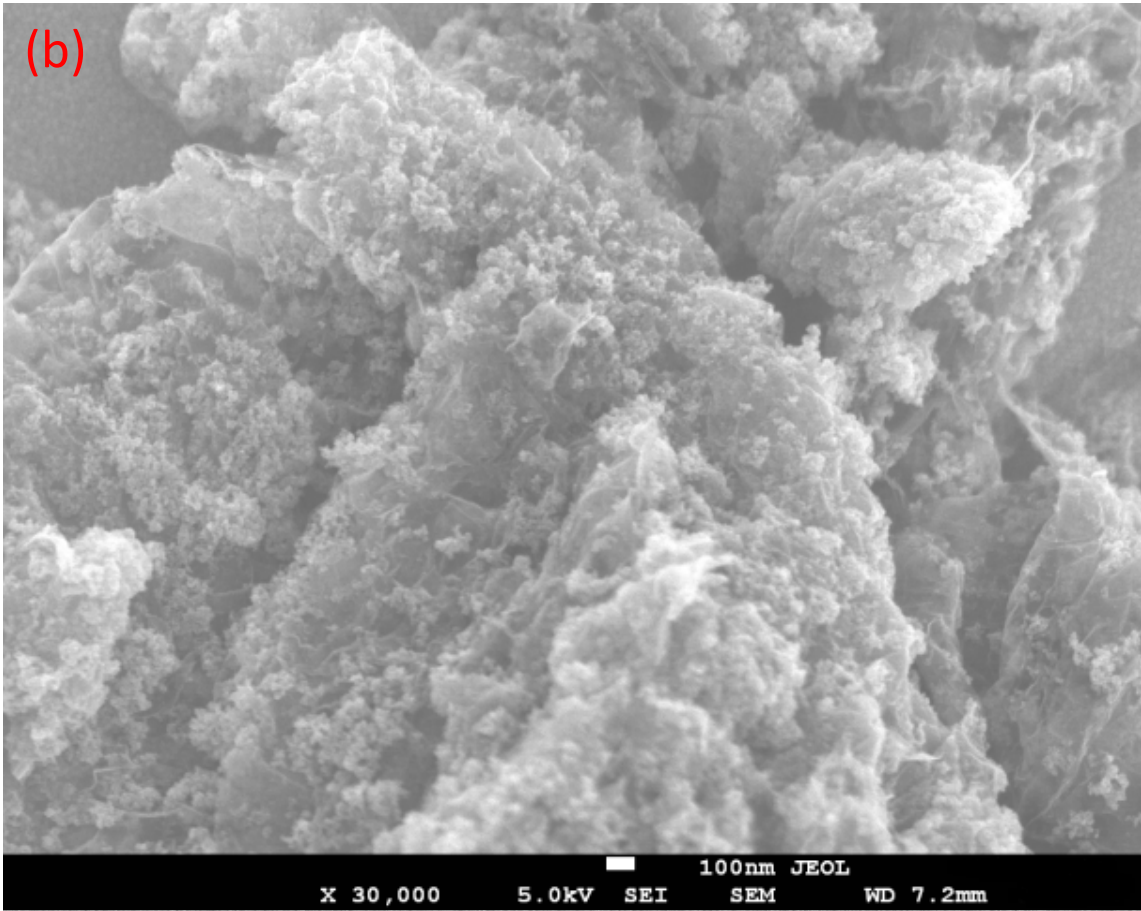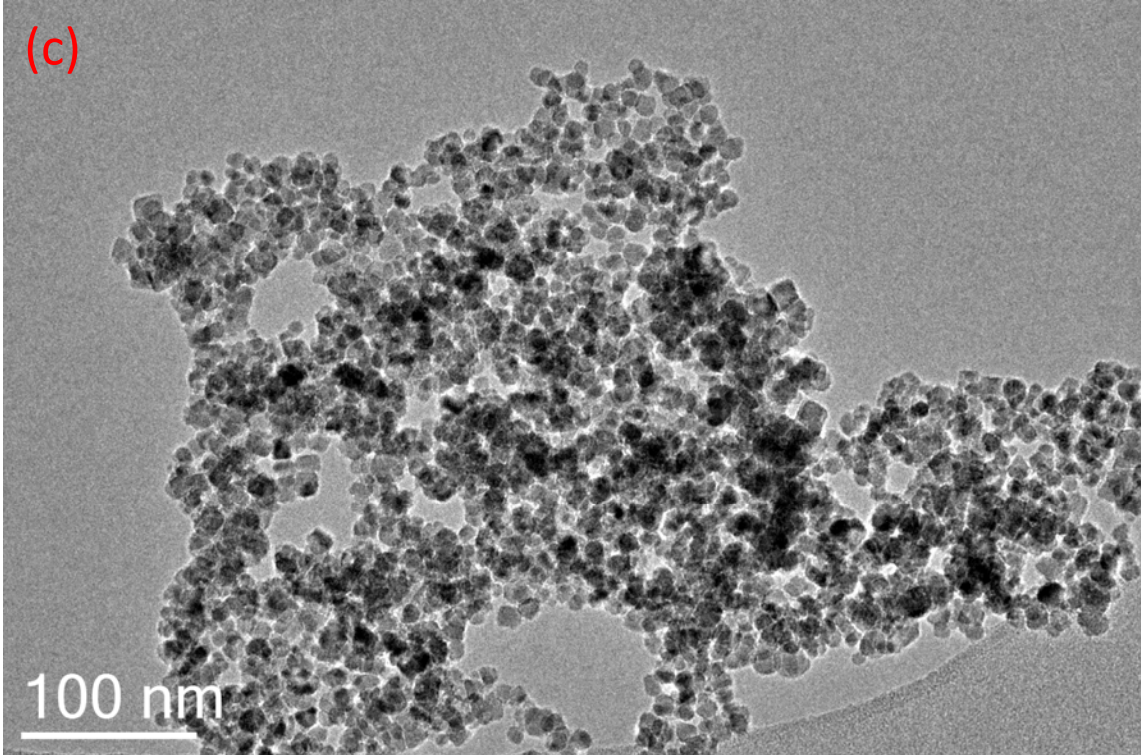

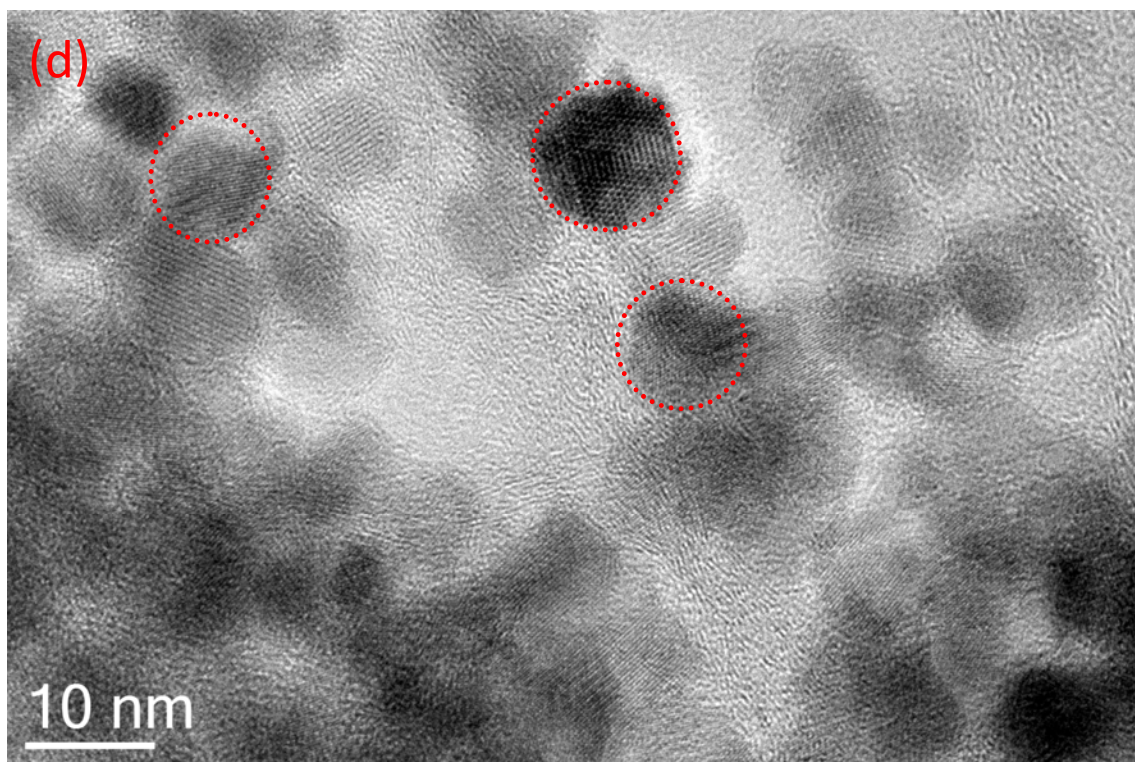

(e)

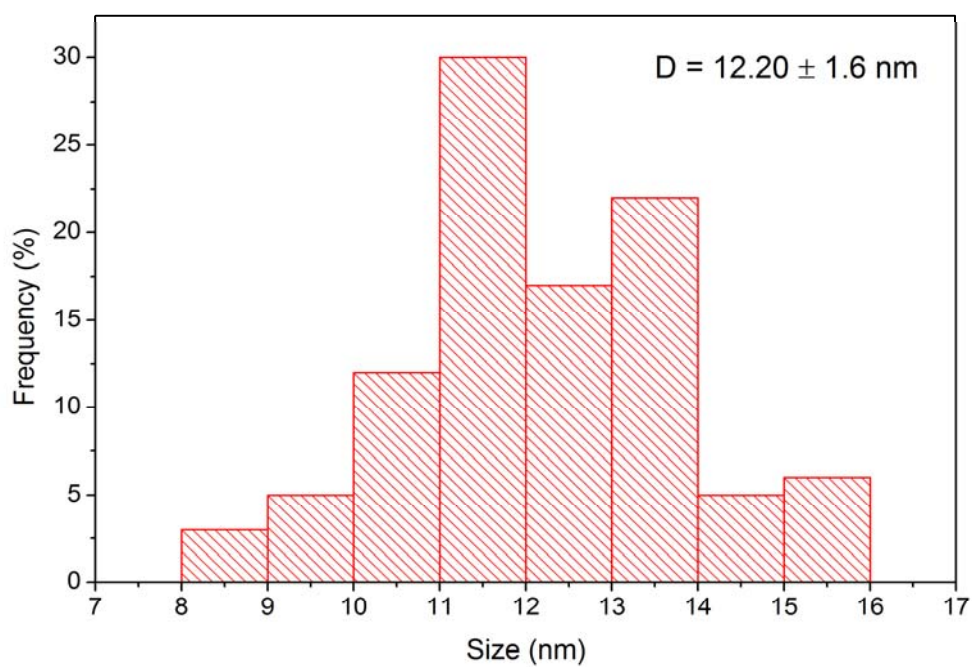

**Figure S6.** SEM (a, b) and TEM (c, d) images of RGO/Fe<sub>3</sub>O<sub>4</sub> at different magnification and (e) its size distribution histogram of loaded Fe<sub>3</sub>O<sub>4</sub> nanoparticles counted from 200 particles. The circled areas in (d) show the high crystallinity of Fe<sub>3</sub>O<sub>4</sub> nanoparticles.



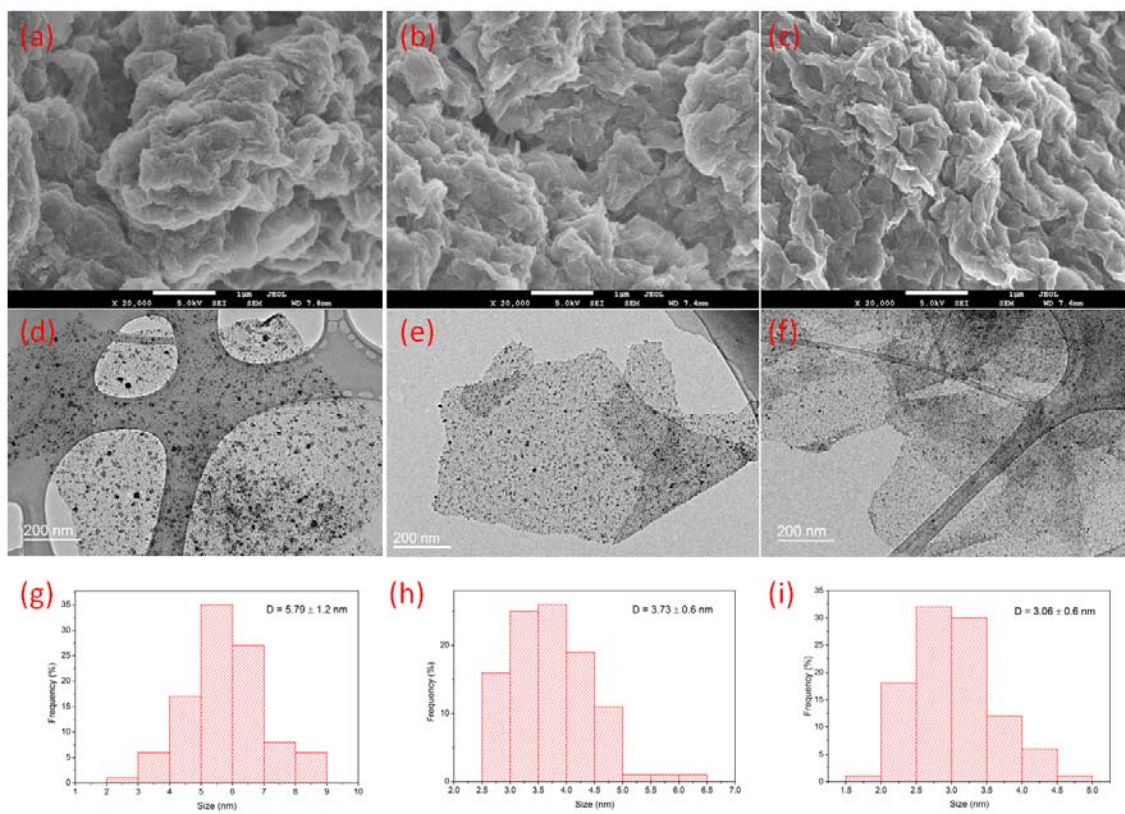

**Figure S7.** SEM (top) and TEM (middle) images, and size distribution histograms (bottom) of RGO-1 (a, d, g), RGO-2 (b, e, h) and RGO-3 (c, f, i).

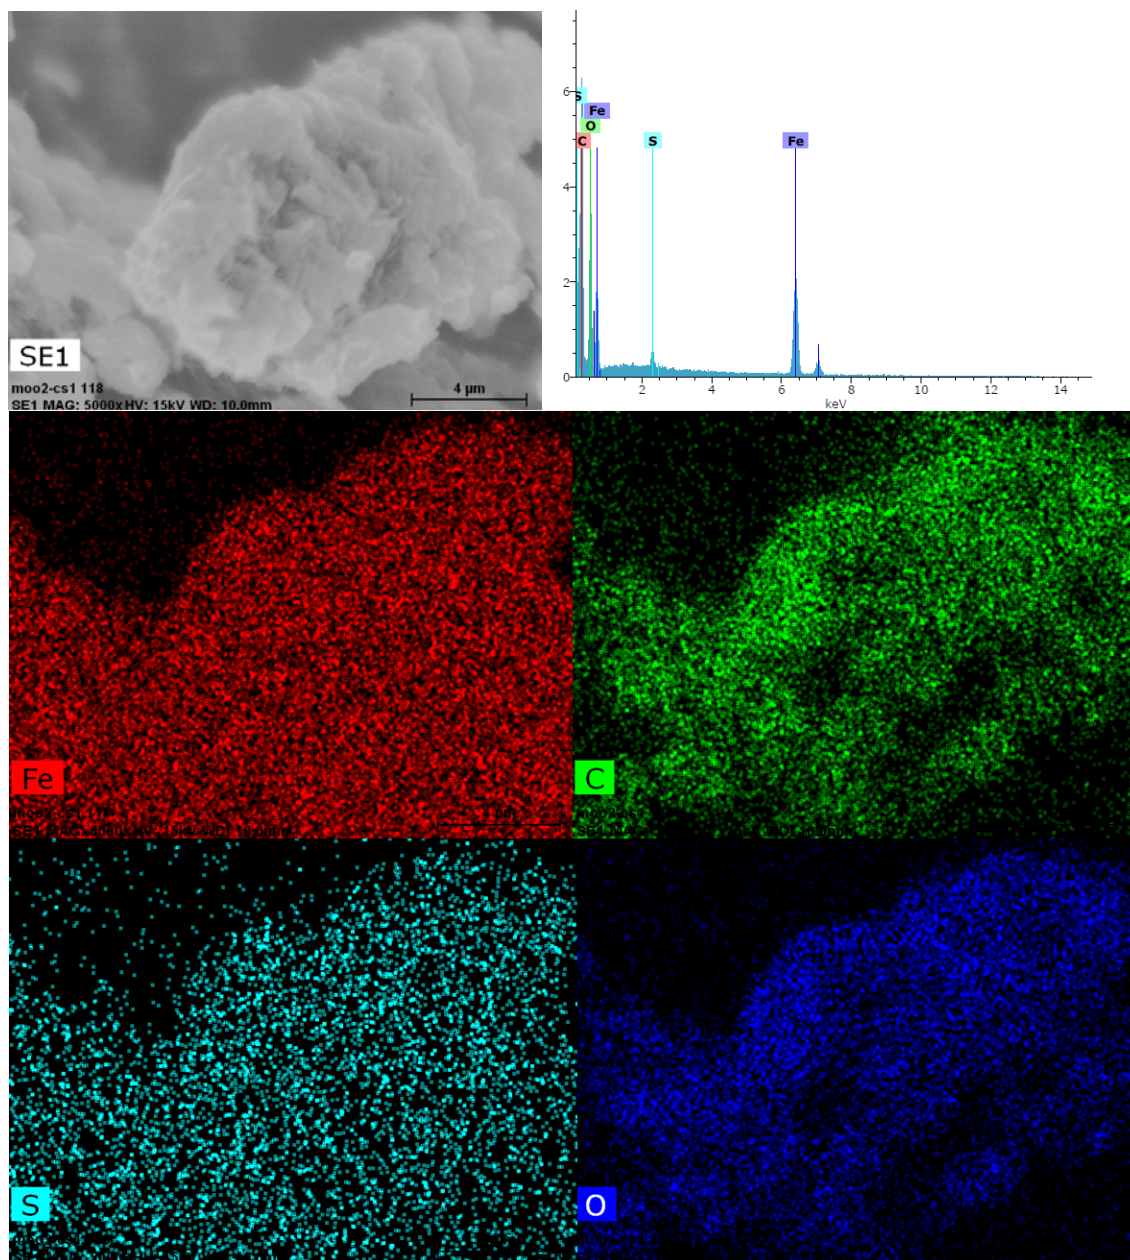

**Figure S8.** EDS elemental mapping of RGOF.

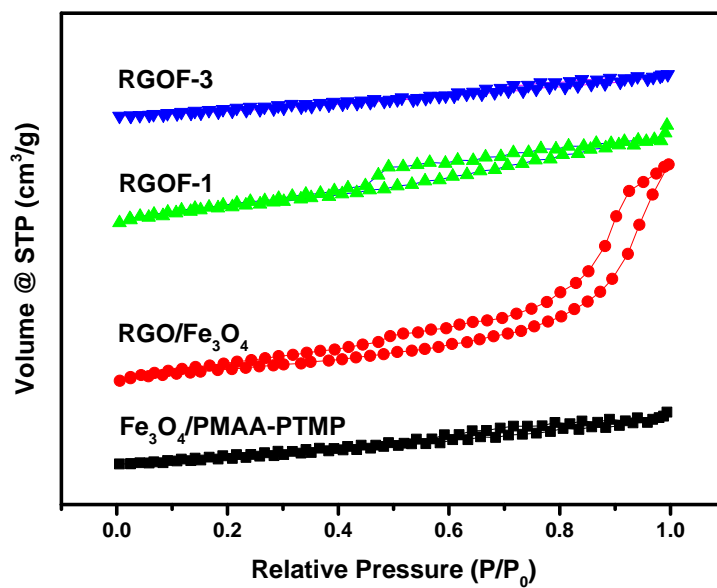

**Figure S9.** N<sub>2</sub> adsorption-desorption isotherms of different samples.

**Table S1.** BET surface areas and BJH pore volumes of different samples.

| Sample                                    | BET [m <sup>2</sup> g <sup>-1</sup> ] | Total pore volume [cm <sup>3</sup> g <sup>-1</sup> ] |
|-------------------------------------------|---------------------------------------|------------------------------------------------------|
| Fe <sub>3</sub> O <sub>4</sub> /PMAA-PTMP | 177.76                                | 0.158                                                |
| RGO/Fe <sub>3</sub> O <sub>4</sub>        | 147.67                                | 0.608                                                |
| RGOF-1                                    | 167.92                                | 0.264                                                |
| RGOF-3                                    | 137.34                                | 0.124                                                |



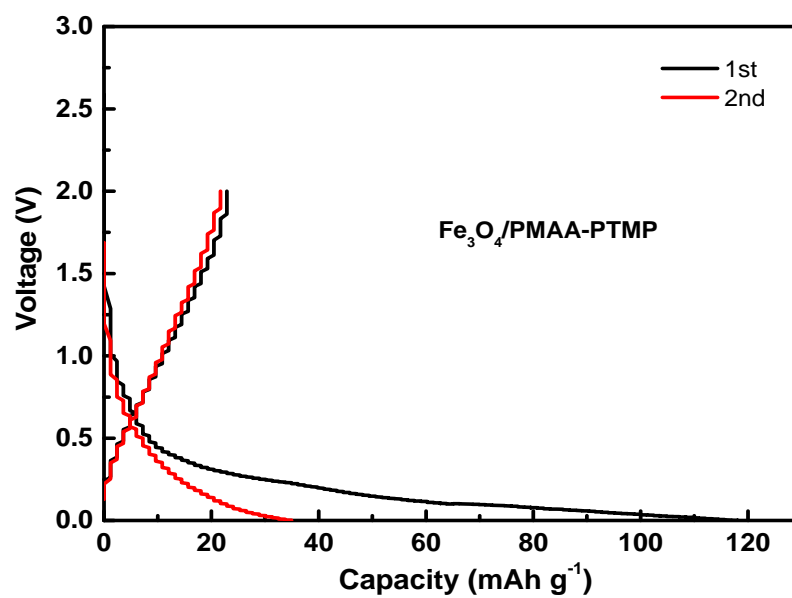

**Figure S10.** 1<sup>st</sup> and 2<sup>nd</sup> cycle discharge and charge profiles of electrode made from Fe<sub>3</sub>O<sub>4</sub>/PMAA-PTMP at a current density of 40 mA g<sup>-1</sup>.

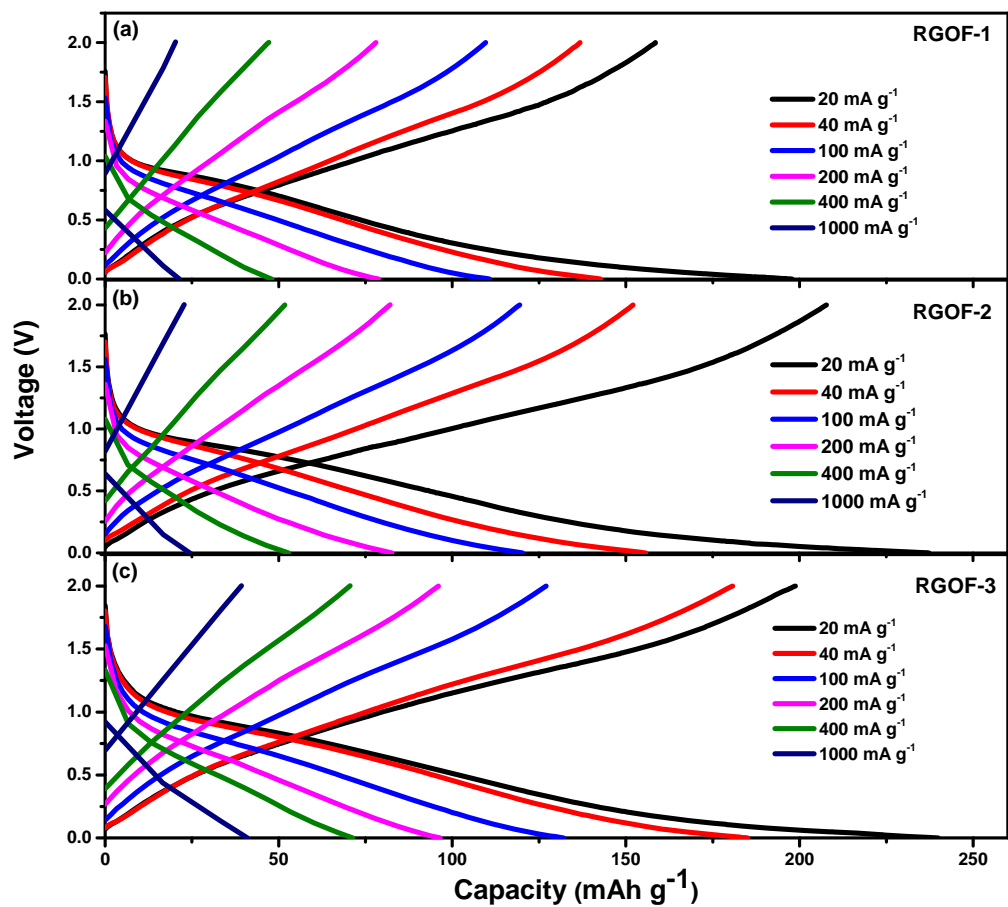

**Figure S11.** The charge-discharge curves of electrode made from RGOF-1(a), RGOF-2(b), RGOF-3(c) at a current density varied from 20 mA g<sup>-1</sup> to 1000 mA g<sup>-1</sup>.
